# Supplementary material for: Seed Endophyte Microbiome of Crotalaria pumila Unpeeled: Identification of Plant-Beneficial Methylobacteria
Source: PubMed Central journal article supplement (PMC5796236; doi:10.3390/ijms19010291), 2018-01-19
Supplement: ijms-19-00291-s001.pdf [file ijms-19-00291-s001.pdf]

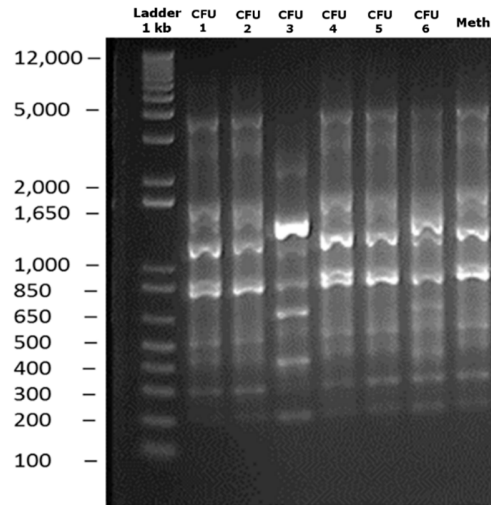

**Figure S1.** BOX-PCR patterns of *Methylobacteria* re-isolated from *Arabidopsis thaliana* seeds. Meth = the inoculated *Methylobacterium* sp. Cp3.

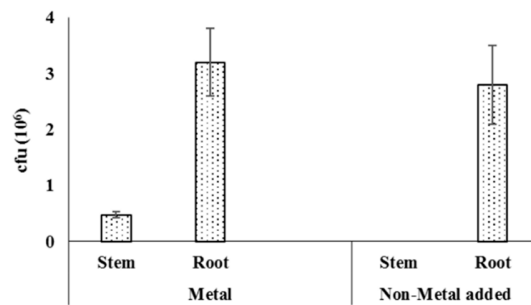

**Figure S2.** Colonies forming units (CFU)  $\pm$  SE of mCherry-labeled *Methylobacterium* sp. Cp3 isolated from surface sterilized roots and stems of *Crotalaria pumila*.

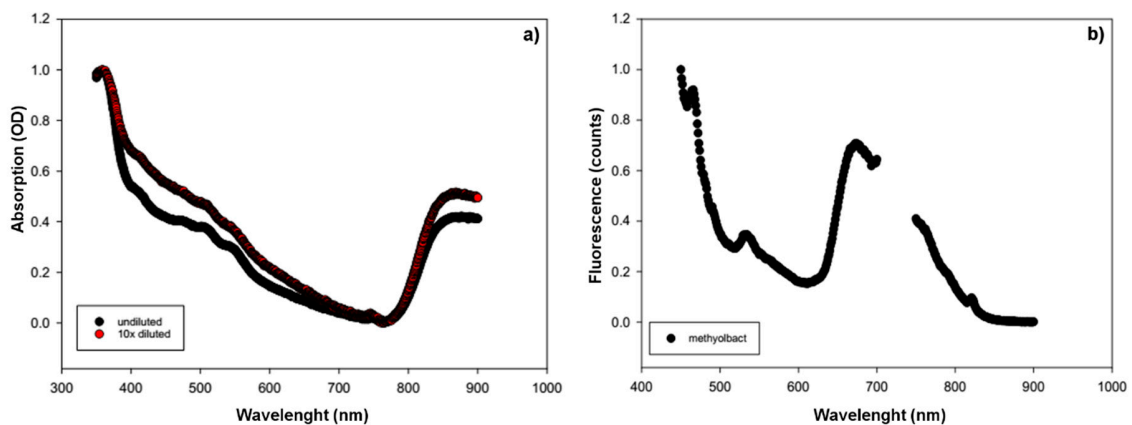

**Figure S3.** Absorbance and emission fluorescence spectra of strain Cp3 grown under light and dark regime. Strong absorbance was observed at 360 nm (a); emission peaks at 450, 520, 650 and 820 nm (b).
